# Supplementary figures and images for: pH-sensitive spectrophotometric control of nilutamide in an automatic micro-flow system
Source: Royal Society of Chemistry journal article supplement (doi:10.1039/c4nj00158c), 2014-01-01

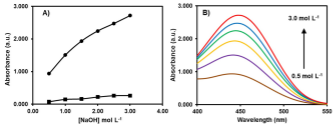

Supplement: c4nj00158c4.pdf [file c4nj00158c4.pdf]
